# Supplementary material
Source: MDPI journal article supplement (https://www.mdpi.com/2304-6775/7/1/18)
Supplement: s1 [file s1]

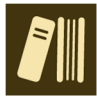

# Survey of Scholarly Reading

## Section 1: Demographics

1. Which of the following best describes your major discipline?
  - ☐ Life sciences
  - ☐ Physical sciences
  - ☐ Medical sciences
  - ☐ Computer science
  - ☐ Mathematics
  - ☐ Engineering
  - ☐ Social sciences
  - ☐ Business
  - ☐ Psychology
  - ☐ Education
  - ☐ Humanities
  - ☐ Fine Arts
  - ☐ Law
  - ☐ Other (please specify): \_\_\_\_\_
  
2. (Dropout) You've indicated that engineering is your major discipline. What category of engineering describes your work best?
  - ☐ Aerospace
  - ☐ Agricultural and Biological
  - ☐ Audio
  - ☐ Bioengineering and Biochemical
  - ☐ Biomedical
  - ☐ Ceramic and Materials
  - ☐ Chemical
  - ☐ Computer
  - ☐ Civil
  - ☐ Electrical
  - ☐ Environmental
  - ☐ Geological and Geophysical
  - ☐ Industrial/ Manufacturing
  - ☐ Marine and Ocean
  - ☐ Mechanical
  - ☐ Mining
  - ☐ Nuclear
  - ☐ Petroleum
  
3. What is your primary workplace?
  - ☐ University/academic institution
  - ☐ Government/Governmental laboratory
  - ☐ Industry/corporation
  - ☐ Other non-profit
  - ☐ Other (please specify): \_\_\_\_\_

4. You've indicated that your primary workplace is a University/academic institution. What is your academic status?
  - ☐ Professor
  - ☐ Associate Professor
  - ☐ Assistant Professor
  - ☐ Postdoctoral researcher
  - ☐ Instructor / lecturer
  - ☐ Doctoral student (Ph.D., M.D, etc.)
  - ☐ Master's or other post-graduate student
  - ☐ Other (please specify): \_\_\_\_\_
5. What is your age?  
\_\_\_\_\_
6. Which of the following countries is your primary place of work? (Dropout)
7. What percentage of your work time do you spend doing research and writing?
  - ☐ None
  - ☐ 1-24%
  - ☐ 25-49%
  - ☐ 50-74%
  - ☐ 75-100%
8. In the past two years, how many of the following have you published? (If the answer is zero, please enter "0" instead of leaving a blank.)
  - ☐ Articles in refereed scholarly journals \_\_\_\_\_
  - ☐ Non-refereed articles \_\_\_\_\_
  - ☐ Scholarly books \_\_\_\_\_
  - ☐ Chapters in scholarly books \_\_\_\_\_
  - ☐ Conference proceedings \_\_\_\_\_
  - ☐ Publications intended for the general public \_\_\_\_\_
  - ☐ Publications intended for professional communities \_\_\_\_\_
  - ☐ Patents \_\_\_\_\_
  - ☐ Audiovisual material, ICT software \_\_\_\_\_
  - ☐ Other \_\_\_\_\_
9. In the past two years, have you received any awards or special recognition for your research or other profession-related contributions?
  - ☐ Yes
  - ☐ No

## Section 2: Reading Practices

10. How important do you consider reading the following types of publications for your work?  
Scale: Absolutely essential, Very important, Important, Somewhat important, not at all important, I don't know
  - ☐ Scholarly journals
  - ☐ Scholarly books or book chapters
  - ☐ Conference proceedings
  - ☐ Governmental documents or other technical or research reports
  - ☐ Professional magazines / trade journals (print or electronic)

- Newspapers / news sites
- Blogs related to your work
- Social media (for example, Facebook, Twitter)
- Textbooks/handbooks
- Standards
- Manuals/spec sheets
- Popular science books
- Other sources (please specify) \_\_\_\_\_

11. From which of the following disciplines do you read literature for your work?

Scale: often, sometimes, never

- Life sciences
- Physical sciences
- Medical sciences
- Computer sciences
- Mathematics
- Engineering
- Social sciences
- Business
- Psychology
- Education
- Humanities
- Fine arts
- Law
- Other (please specify): \_\_\_\_\_

### Section 3: Scholarly Article Reading (Print and Online)

12. In the past month (30 days), approximately how many **scholarly articles** have you read? Articles can include those found in journal issues, websites, or separate copies such as preprints, reprints, and other electronic or paper copies. Reading is defined as going beyond the table of contents, title, and abstract to the body of the article.

Number of articles read (including skimmed) in the past month:

\_\_\_\_\_ (If "0" skip to Q30)

The following questions in this section refer to the **SCHOLARLY ARTICLE YOU READ MOST RECENTLY**, even if you had previously read this article. Note that while this last reading may not be typical, it will help us establish the range of patterns in reading behavior.

13. What year was the last article you read published/posted?

\_\_\_\_\_

- Within the last year
- Within the last 2-5 years
- Within the last 6-10 years
- Within the last 11-15 years
- More than 15 years ago
- Don't know/don't remember

14. How thoroughly did you read this article?

- I read all of it with great care
- I read parts of it with great care

- I read with attention to the main points
  - I read only specific sections (for example, figures, conclusions)
  - I skimmed it just to get the idea
- 15. Had you previously read this article, i.e., is this a re-reading?
  - Yes
  - No
- 16. How long (in minutes) did you spend reading this last article at this reading?  
In minutes: \_\_\_\_\_
- 17. How did you become aware of the last article you read?
  - Found while browsing in a publication or website (without a specific objective in mind) **(skip to Q17)**
  - Found while I (or someone on my behalf) was searching (for example, by subject or author's name) **(skip to Q18)**
  - Cited in another publication **(skip to Q19)**
  - Another person (for example, a colleague) told me about it **(skip to Q19)**
  - Do not know / Do not remember **(skip to Q19)**
  - Other (please specify): \_\_\_\_\_ **(skip to Q19)**
- 18. Found while browsing: **(after answering, skip to Q19)**
  - Personal print subscription
  - Personal online subscription
  - Library print subscription
  - Library online subscription
  - Departmental or organizational print subscription
  - Departmental or organizational online subscription
  - Other workplace subscription (Please specify \_\_\_\_\_)
  - Website
  - Other (please specify): \_\_\_\_\_
- 19. Found while I (or someone on my behalf) was searching:
  - Web search engine (for example, Google or Google Scholar)
  - Electronic indexing / abstracting service (for example, Academic Search Premier, Web of Science)
  - Print index or abstract
  - Online journal collection (for example, JSTOR)
  - Online current awareness service (for example, Current Contents)
  - Preprint / e-print service (for example, arXiv.org)
  - Other (please specify): \_\_\_\_\_
- 20. After you became aware of this article, from where did you obtain it?
  - Personal subscription
  - Library subscription
  - Department, etc. subscription
  - Institutional or subject repository
  - Free web journal
  - Preprint copy
  - Copy of the article from a colleague, author, etc.

- Interlibrary loan / document delivery service
- An author's website
- Other website
- Research social networking sites (for example, ResearchGate, Academia.edu)
- Other (please specify): \_\_\_\_\_

21. This source was:

- Print
- Electronic

22. In what format was the article when you read it?

- Print article in a print journal
- Downloaded and printed on paper
- Previously downloaded / saved and read on computer screen
- Live online (desktop or laptop)
- On a mobile phone, e-reader, or tablet screen
- Other (please specify): \_\_\_\_\_

23. Where were you when you read this article?

- Office or lab
- Library
- Home
- Traveling or commuting
- Elsewhere (please specify): \_\_\_\_\_

24. For what purposes did you read this article? (Choose all that apply)

- ☐ Research
- ☐ Teaching
- ☐ Administration
- ☐ Current awareness / keeping up
- ☐ Writing proposals, reports, articles, etc.
- ☐ Writing funding/grant opportunities
- ☐ Consulting, advising others
- ☐ Internal or external presentations (for example, lecture or conference paper)
- ☐ Continuing education for self
- ☐ Check or verify facts
- ☐ Interest / pleasure / inspiration
- ☐ Other                      work-related                      purpose                      (please                      specify):  
\_\_\_\_\_

25. For what principal purpose was this article read? (Choose only the best answer)

- Research
- Teaching
- Administration
- Current awareness / keeping up
- Writing proposals, reports, articles, etc.
- Writing funding/grant opportunities
- Consulting, advising others
- Internal or external presentations (for example, lecture or conference paper)
- Continuing education for self
- Check or verify facts

- Interest / pleasure / inspiration
- Other work-related purpose (please specify): \_\_\_\_\_

26. In what ways did the reading of the article affect the principal purpose? (Choose all that apply)

- ☐ It improved the result
- ☐ It narrowed / broadened / changed the focus
- ☐ It inspired new thinking / ideas
- ☐ It resulted in collaboration / joint research
- ☐ It wasted my time
- ☐ It resulted in faster completion
- ☐ It resolved technical problems
- ☐ It made me question my work
- ☐ It helped to justify my work or make critical comments
- ☐ It saved time or other resources
- ☐ Other (please specify): \_\_\_\_\_

27. How important was the article to your work?

- Absolutely essential
- Very important
- Important
- Somewhat important
- Not at all important

28. Did you cite this article or do you plan to cite it in a paper or report?

- No
- Maybe
- Already did
- Will in the future

29. Did you share the article or ideas raised by the article in social media (for example, Twitter, LinkedIn, academia.edu)?

- Yes, I shared the article
- Yes, I shared the ideas raised by the article
- No
- No, but I will in the future

#### Section 4: Other Publication Reading (print and online)

30. In the past month (30 days) approximately how many **other publications** (non-article readings) did you read for work/research? Include books or book chapters, conference proceedings, government documents, technical reports, magazines, trade journals, etc. A book reading may include just reading a portion of the book such as skimming or reading a chapter. (If none, please enter "0" instead of leaving a blank.)

- Scholarly books or book chapters
- Conference proceedings
- Governmental documents or other technical or research reports
- Professional magazines / trade journals (print or electronic)
- Newspapers / news sites
- Blogs related to your work
- Social media (for example, Facebook, Twitter)

- Textbooks/handbooks
- Standards
- Manuals/spec sheets
- Popular science books
- Other sources (please specify) \_\_\_\_\_

The following questions in this section refer to the PUBLICATION FROM WHICH YOU READ MOST RECENTLY. Note that this last reading may not be typical, but will help establish the range of patterns in reading behavior.

31. What type of publication did you most recently read?

- Scholarly book or book chapter
- Conference proceedings
- Governmental document or other technical or research report
- Professional magazine / trade journal (print or electronic)
- Newspaper/ news site
- Blog related to your work
- Social media (for example, Facebook, Twitter)
- Textbook/handbook
- Popular science book
- Other sources (please specify) \_\_\_\_\_

32. About how much total time (in minutes) did you spend reading this publication this most recent time?

\_\_\_\_\_

33. What year was the last publication you read published/posted?

\_\_\_\_\_

- Within the last year
- Within the last 2-5 years
- Within the last 6-10 years
- Within the last 11-15 years
- More than 15 years ago
- Don't know/don't remember

34. How thoroughly did you read this publication?

- I read all of it with great care
- I read parts of it with great care
- I read with attention to the main points
- I read only specific sections (for example, figures, conclusions)
- I skimmed it just to get the idea

35. How did you become aware of this last publication from which you read?

- Found while browsing (without a specific objective in mind)
- Found while I (or someone on my behalf) was searching (for example, by subject or author's name)
- Cited in another publication
- Another person (for example, a colleague) told me about it
- Promotional email or web advertisement
- Do not know / Do not remember
- Other (please specify): \_\_\_\_\_

36. After you became aware of this publication, from where did you obtain it?
- ☐ I bought it for myself
  - ☐ The library collection
  - ☐ Interlibrary loan or document delivery service
  - ☐ Department collection
  - ☐ Institutional or subject repository
  - ☐ A colleague, author, or other person provided it to me
  - ☐ Free website
  - ☐ Other (please specify): \_\_\_\_\_
37. In what format was the publication when you read it?
- ☐ Print (for example, book, newspaper, etc.)
  - ☐ Downloaded and printed on paper
  - ☐ Previously downloaded / saved and read on computer screen
  - ☐ Live online (desktop or laptop)
  - ☐ On a mobile, e-reader, or tablet screen
  - ☐ Other (please specify): \_\_\_\_\_
38. Had you previously read this publication (i.e., is this a re-reading)?
- ☐ Yes
  - ☐ No
39. Where were you when you read this publication?
- ☐ Office or lab
  - ☐ Library
  - ☐ Home
  - ☐ Traveling or commuting
  - ☐ Elsewhere (please specify): \_\_\_\_\_
40. For what purposes did you read this publication? (Choose all that apply)
- ☐ Research
  - ☐ Teaching
  - ☐ Administration
  - ☐ Current awareness / keeping up
  - ☐ Writing proposals, reports, articles, etc.
  - ☐ Writing funding/grant opportunities
  - ☐ Consulting, advising others
  - ☐ Internal or external presentations (for example, lecture or conference paper)
  - ☐ Continuing education for self
  - ☐ Check or verify facts
  - ☐ Interest / pleasure / inspiration
  - ☐ Other work-related purpose (please specify): \_\_\_\_\_
41. For what principal purpose did you read this publication? (Choose only the best answer)
- ☐ Research
  - ☐ Teaching
  - ☐ Administration
  - ☐ Current awareness / keeping up
  - ☐ Writing proposals, reports, articles, etc.
  - ☐ Writing funding/grant opportunities

- Consulting, advising others
- Internal or external presentations (for example, lecture or conference paper)
- Continuing education for self
- Check or verify facts
- Interest / pleasure / inspiration
- Other work-related purpose (please specify): \_\_\_\_\_

42. In what ways did the reading of the publication affect the principal purpose? (Choose all that apply)

- ☐ It improved the result
- ☐ It narrowed / broadened / changed the focus
- ☐ It inspired new thinking / ideas
- ☐ It resulted in collaboration / joint research
- ☐ It wasted my time
- ☐ It resulted in faster completion
- ☐ It resolved technical problems
- ☐ It made me question my work
- ☐ It helped to justify my work or make critical comments
- ☐ It saved time or other resources
- ☐ Other (please specify): \_\_\_\_\_

43. How important was the information contained in this publication to your work?

- Absolutely essential
- Very important
- Important
- Somewhat important
- Not at all important

44. Did you cite this publication or do you plan to cite it in another publication (for example, article, report, book, published proceeding)?

- No
- Maybe
- Already did
- Will in the future

45. Did you share the article or ideas raised by the publication in social media?

- Yes, I shared the publication
- Yes, I shared the ideas raised by the publication
- No
- No, but I will in the future

## Section 5: Social Media

You are almost finished!

46. How important do you consider each of these platforms to your work (research, teaching)?  
Scale: not at all important, somewhat important, important, very important, absolutely essential

- Email lists or listservs
- Blogging (for example, Wordpress, Blogster)
- Microblogging (for example, Twitter, Tumblr)

- Institutional repository
- Cloud services (for example, Dropbox, Google Drive)
- Reference management software (for example, Mendeley, Zotero)
- Research social networks (for example, ResearchGate, Academia.edu)
- General social networks (for example, Facebook, Goodreads)
- Collaborative authoring (for example, Google Docs, Sharepoint)
- User comments in articles
- Image sharing (for example, Instagram, Flickr)
- Audio sharing (for example, podcasts)
- Video sharing (for example, YouTube, Vimeo)

47. How important do you consider each of these e-publication features to your work (research, teaching)?

Scale: not at all important, somewhat important, important, very important, absolutely essential

- Mobile phone compatible
- Tablet compatible
- Ability to share publication or content with colleagues
- Enhanced navigation (ability to jump to footnotes, tables, & graphics & back to the body of the text)
- Note-taking and highlighting capability
- Global language support (includes vertical writing & writing from left-to-right & vice versa)
- Video embeddedness component
- Audio embeddedness component
- Other (please specify): \_\_\_\_\_

48. What other features/characteristics would you like to see in e-scholarly articles in the future?

---



---



---



---

49. How has your reading and sharing of scholarly materials changed in the last few years and how do you expect it to change in the next year or two?

---



---



---



---

**You've reached the end of the survey. We appreciate your participation. Thank you!**
